# Supplementary material
Source: HighWire-hosted journal article supplement (https://rc.rcjournal.com/content/suppl/2021/05/06/respcare.08622)
Supplement: suppl_2.pdf [file suppl_2.pdf]

# E-Figure 1

E-Figure 1. Subjects treated with NIOS for more than 42 h had similar probability of survival than subjects who failed NIOS earlier. The non-significant difference in mortality between these two cohorts was confirmed after adjustment for age, SAPS II score and PaO<sub>2</sub>/FiO<sub>2</sub> at enrollment, with a hazard ratio of 1.3 [CI95% 0.5-3.3] (p=0.54).

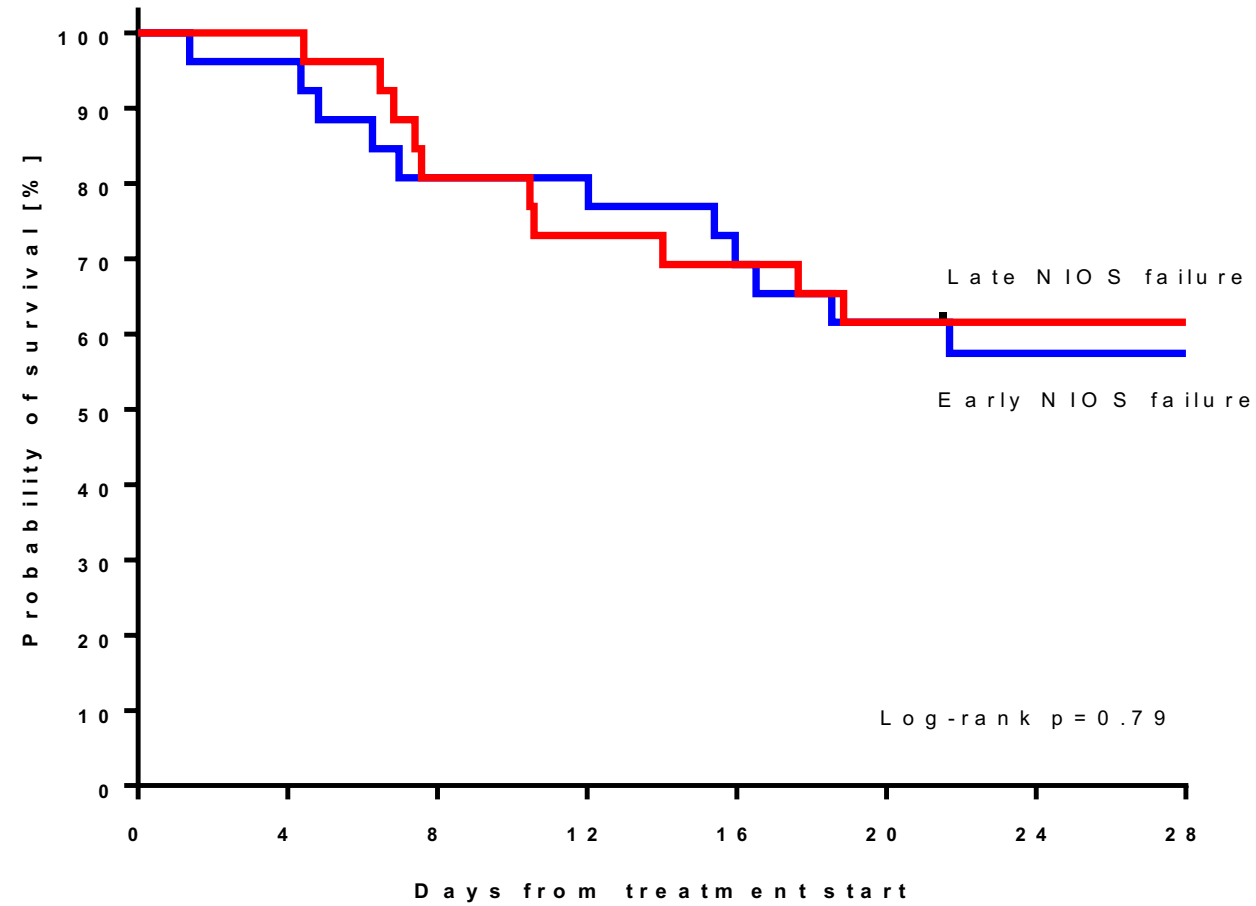

**Subjects at risk, n**

|                    |    |    |    |    |    |    |    |    |
|--------------------|----|----|----|----|----|----|----|----|
| Late NIOS failure  | 26 | 26 | 21 | 19 | 18 | 16 | 16 | 16 |
| Early NIOS failure | 26 | 25 | 22 | 22 | 19 | 17 | 15 | 15 |
